# Supplementary material for: Synthesis and CO2 Capture of Porous Hydrogel Particles Consisting of Hyperbranched Poly(amidoamine)s
Source: MDPI journal article supplement (doi:10.3390/gels8080500), 2022-08-11
Supplement: s1 [file s1]

# Supplementary Materials

## Synthesis and CO<sub>2</sub> Capture of Porous Hydrogel Particles Consisting of Hyperbranched Poly(amidoamine)s

Hojung Choi <sup>1,†</sup>, Sanghwa Lee <sup>1,†</sup>, SeongUk Jeong <sup>1</sup>, Yeon Ki Hong <sup>2</sup> and Sang Youl Kim <sup>1,\*</sup>

<sup>1</sup> Department of Chemistry, Korea Advanced Institute of Science and Technology (KAIST), Daejeon 34141, Korea

<sup>2</sup> School of Chemical and Materials Engineering, Korea National University of Transportation, Chungju-si 27469, Korea

\* Correspondence: kimsy@kaist.ac.kr; Tel.: +82-42-350-2834

† These authors contributed equally to this work.

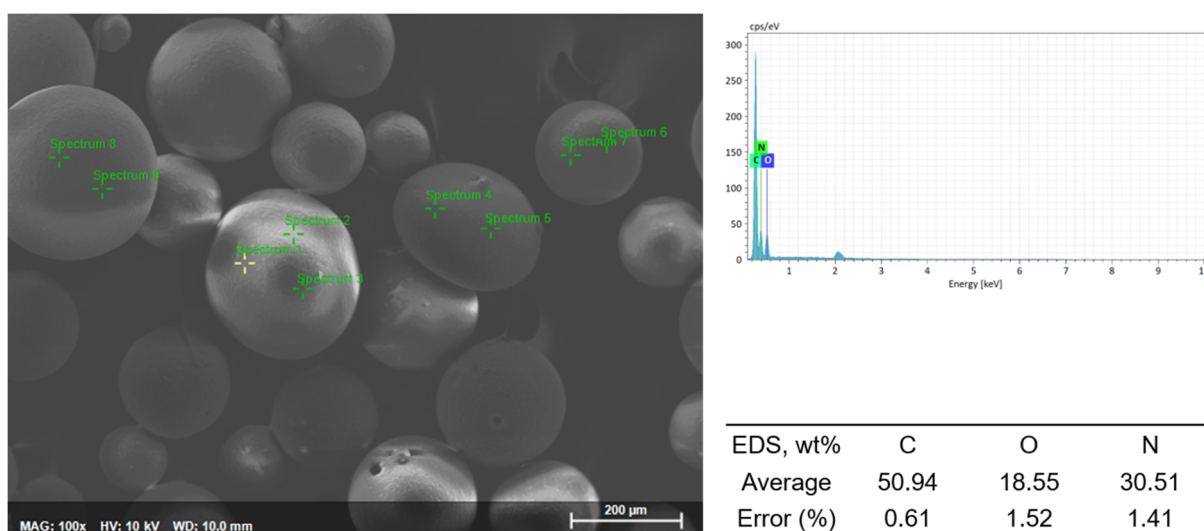

Figure S1. SEM images and EDS analysis of P-M<sub>1.4</sub>A<sub>1400</sub>T<sub>0.6</sub>.

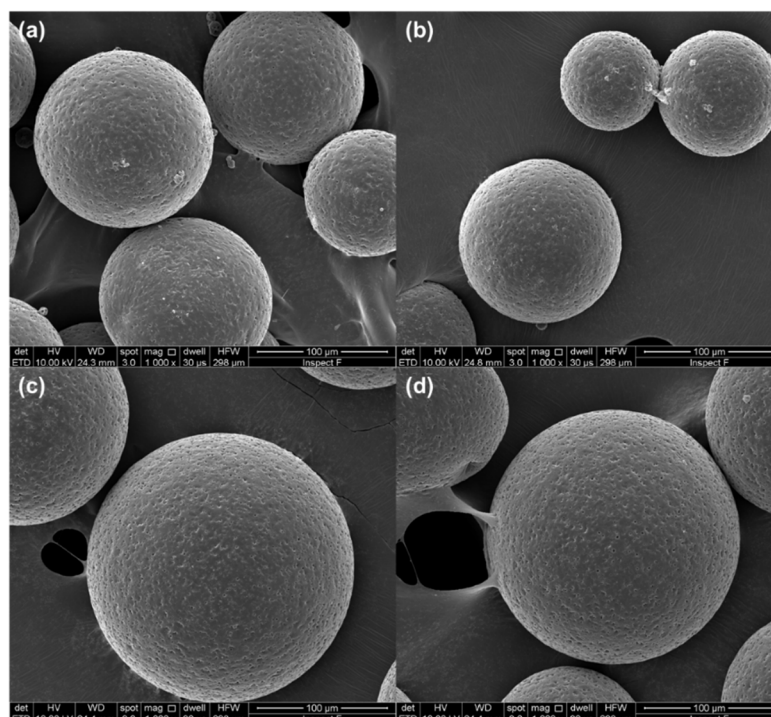

**Figure S2.** SEM images of P-M<sub>1.5</sub>A<sub>3000</sub>, W/O agitation speed of 1400 rpm (a,b) and P-M<sub>1.5</sub>A<sub>3000</sub>, W/O agitation speed of 1000 rpm (c,d).

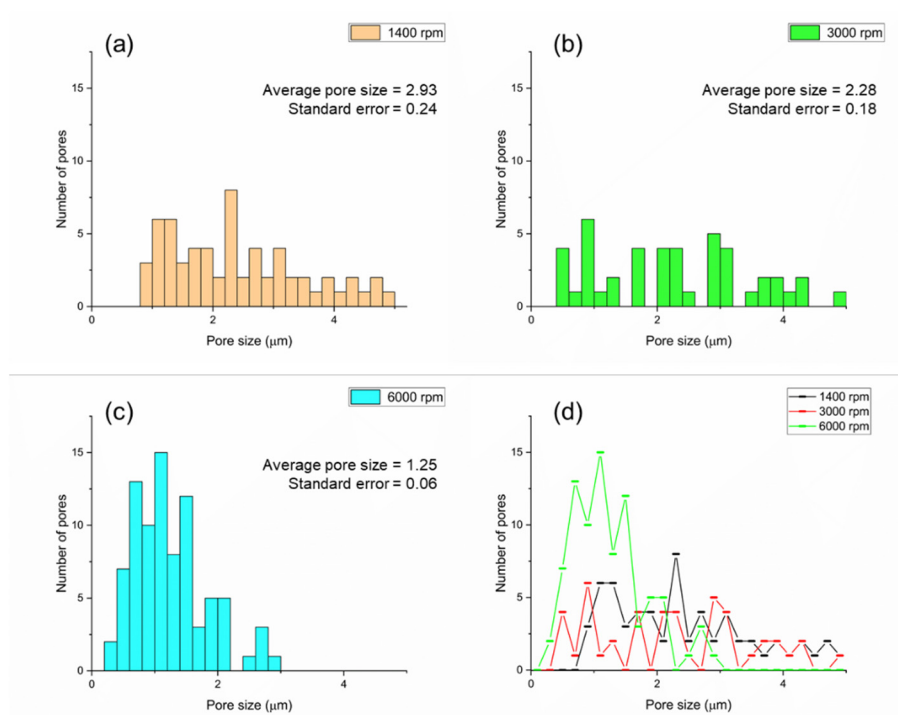

**Figure S3.** Pore size distribution of various O<sub>1</sub>/W agitation speeds, 1400 rpm (a), 3000 rpm (b), 6000 rpm (c), and merged graph (d), based on SEM images of Figure 2.

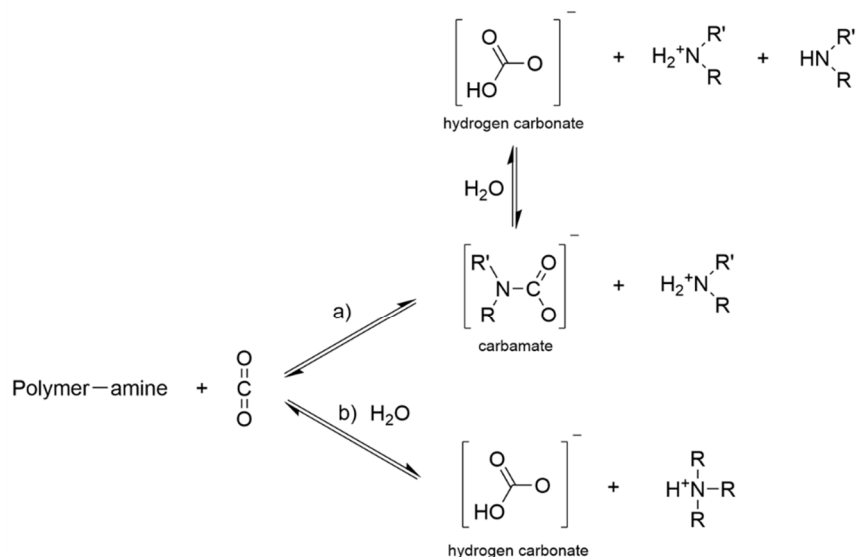

a) Carbamate and hydrogen carbonate formation of primary and secondary amine under CO<sub>2</sub> atmosphere  
b) Hydrogen carbonate formation of tertiary amine in the presence of H<sub>2</sub>O

**Figure S4.** Reactions of amine and carbon dioxide [1–4].

## References

1. D'Alessandro, D.M.; Smit, B.; Long, J.R. Carbon Dioxide Capture: Prospects for New Materials. *Angew. Chem. Int. Ed.* **2010**, *49*, 6058–6082.
2. Henao, W.; Jaramillo, L.Y.; López, D.; Romero-Sáez, M.; Buitrago-Sierra, R. Insights into the CO<sub>2</sub> capture over amine-functionalized mesoporous silica adsorbents derived from rice husk ash. *J. Environ. Chem. Eng.* **2020**, *8*, 104362.
3. Taniguchi, I.; Kinugasa, K.; Toyoda, M.; Minezaki, K. Effect of amine structure on CO<sub>2</sub> capture by polymeric membranes. *Sci.*

*Technol. Adv. Mater.* **2017**, *18*, 950–958.

4. Varghese, A.M.; Karanikolos, G.N. CO<sub>2</sub> capture adsorbents functionalized by amine-bearing polymers: A review. *Int. J. Greenh. Gas Control* **2020**, *96*, 103005.
